# Supplementary material
Source: publisher site journal article supplement (https://www.dovepress.com/get_supplementary_file.php?f=392915.docx)
Supplement: Supplementary file 1 [file get_supplementary_file.php]

Supplementary table 1. Categorization of hypertensive disorders.

|  |  |  |
| --- | --- | --- |
|  | Blood pressure | Urinary protein |  | In the absence of proteinuria |
| Non-hypertensive | Systolic <140  Diastolic <90 | None | |  |
| Gestational hypertension | Systolic ≥140  Diastolic ≥90 |
| Preeclampsia | Systolic ≥140  Diastolic ≥90 | Urinary protein ≥300 mg/24 h,  Protein-to-creatinine ratio ≥0.3,  or dipstick ≥2+ | | Renal insufficiency (creatinine >1.1 mg/dL or doubling),  liver dysfunction (liver transaminase level twice that of the normal range),  thrombocytopenia, pulmonary edema,  new-onset headache unresponsive to medication,  or visual symptoms. |
| Severe preeclampsia | Systolic ≥160  Diastolic ≤110 |

The data presented in this table is formalized using American College of Obstetricians and Gynecologists (ACOG) guideline 20197.

|  |  |  |  |  |
| --- | --- | --- | --- | --- |
|  |  |  |  |  |
| RBC indices | Mathematical formulas |  |  |  |
| Mentzer index | MCV/RBC |  |  |  |
| Shine and Lal | MCV2 x MCH/100 |  |  |  |
| Srivastava | MCH/RBC |  |  |  |
| Siradah | MCV- RBC- 3xHb |  |  |  |
| Ehsani | MCV-10xRBC |  |  |  |
| MCV: mean corpuscular volume, MCH: mean cell hemoglobin, Hb: Hemoglobulin | |  |  |  |

Supplementary table 2. Red blood cell (RBC) indices.
